# Supplementary material for: Lanthanide ion exchange properties of a coordination polymer consisting of di(2-ethylhexyl) phosphoric acid and trivalent metal ions (Ce3+, Fe3+, or Al3+)
Source: Royal Society of Chemistry journal article supplement (doi:10.1039/c3dt53407c), 2014-01-01
Supplement: c3dt53407c.pdf [file c3dt53407c.pdf]

Electric Supporting Information for

**Lanthanide Ion Exchange Properties of Coordination Polymer  
Consisting of di(2-Ethylhexyl) Phosphoric Acid and Trivalent  
Metal Ions ( $\text{Ce}^{3+}$ ,  $\text{Fe}^{3+}$ , or  $\text{Al}^{3+}$ )**

Kenta Ooi, Yuiko Tasaki-Handa,\* Yukie Abe, and Akihiro Wakisaka

*Research Institute for Environmental Management Technology, National Institute of Advanced Industrial Science and  
Technology (AIST) Onogawa 16-1, Tsukuba, Ibaraki, Japan. Fax: +81-29-861-8252; Tel: +81-29-861-8772;  
E-mail: [yuiko-tasaki@aist.go.jp](mailto:yuiko-tasaki@aist.go.jp)*

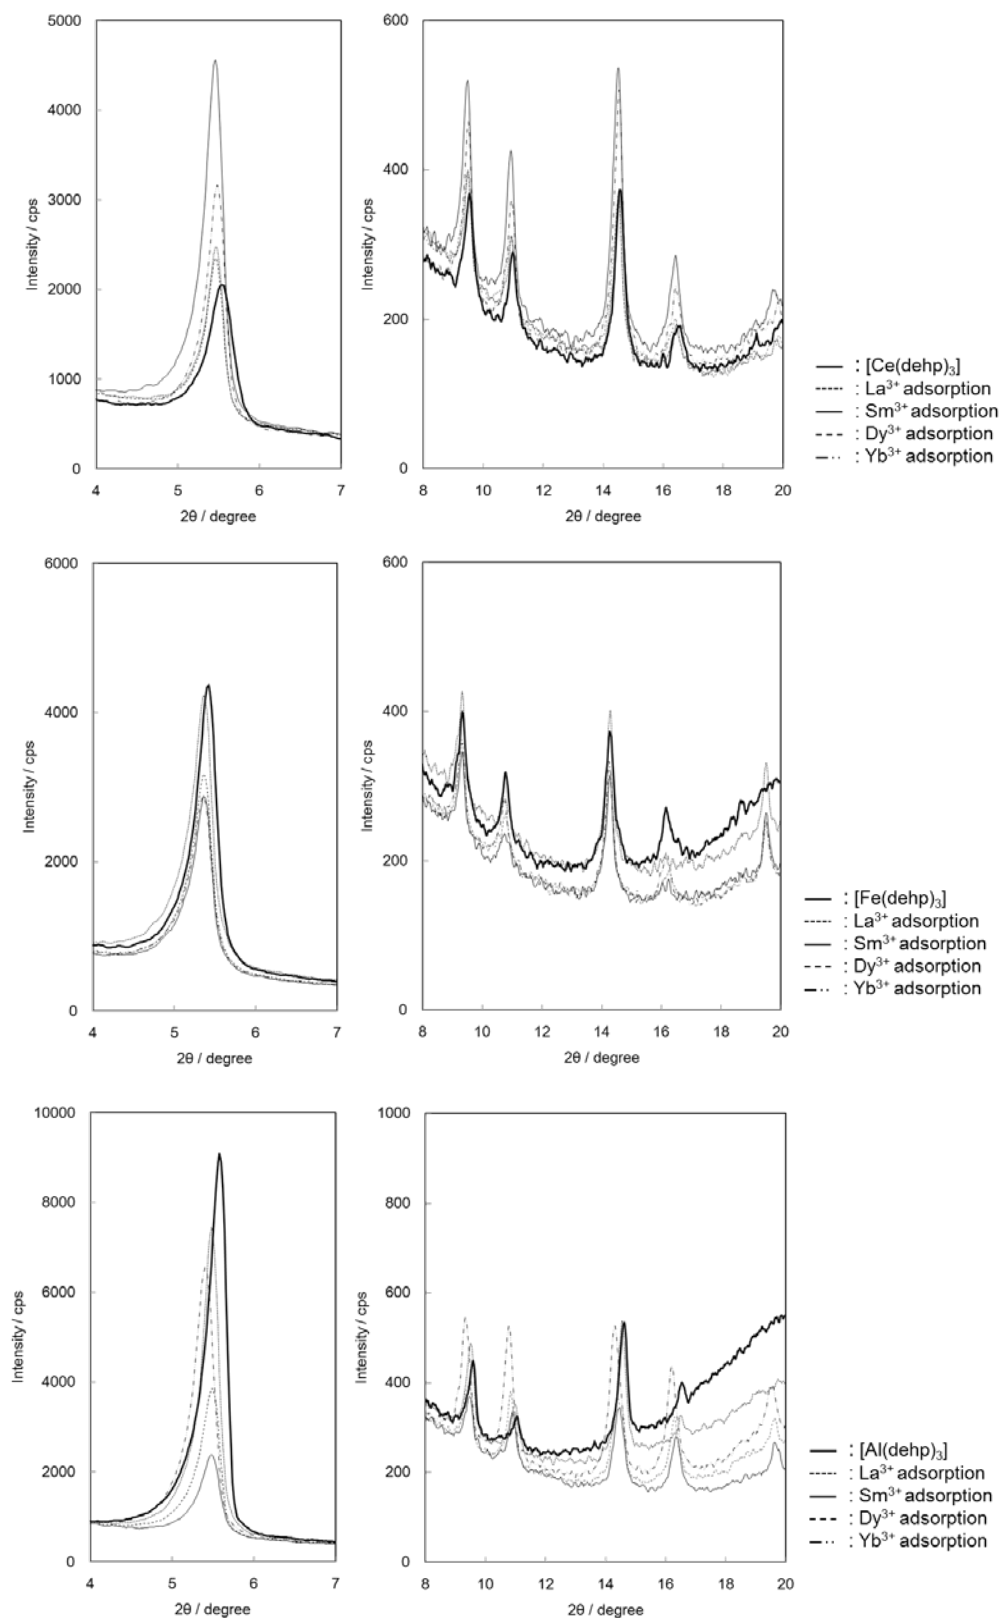

**Figure S1.** XRD patterns of [M(dehp)<sub>3</sub>] before and after Ln<sup>3+</sup> adsorption.

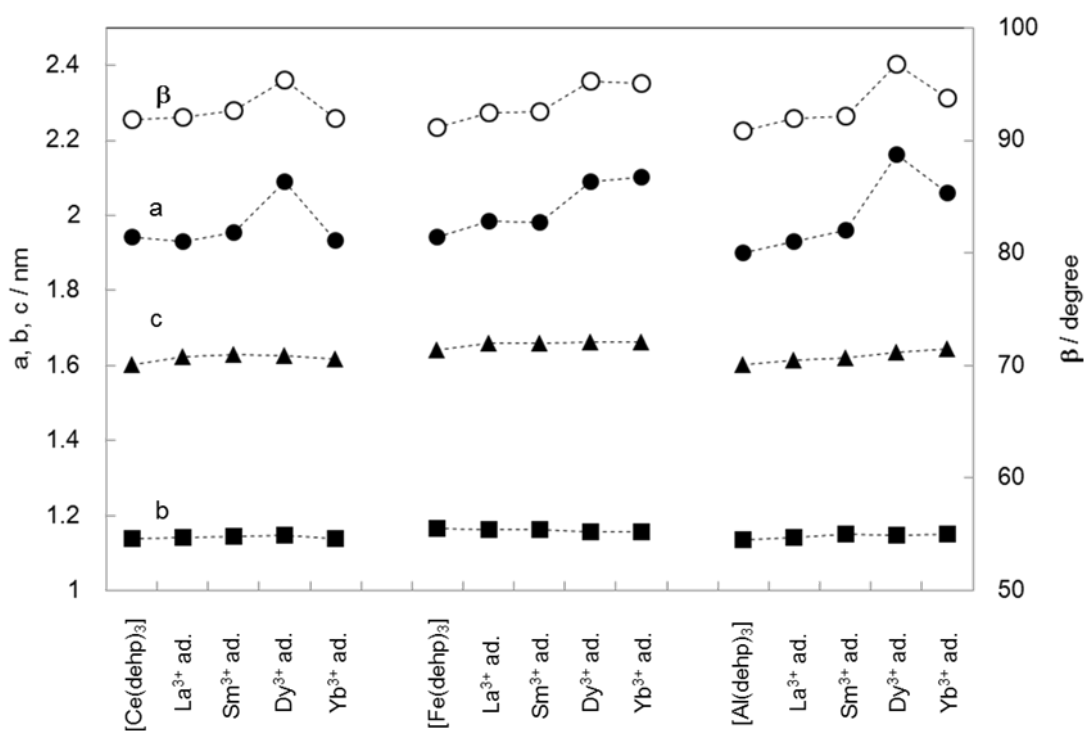

**Figure S2.** Lattice parameters of  $[M(\text{dehp})_3]$  before and after  $\text{Ln}^{3+}$  adsorption

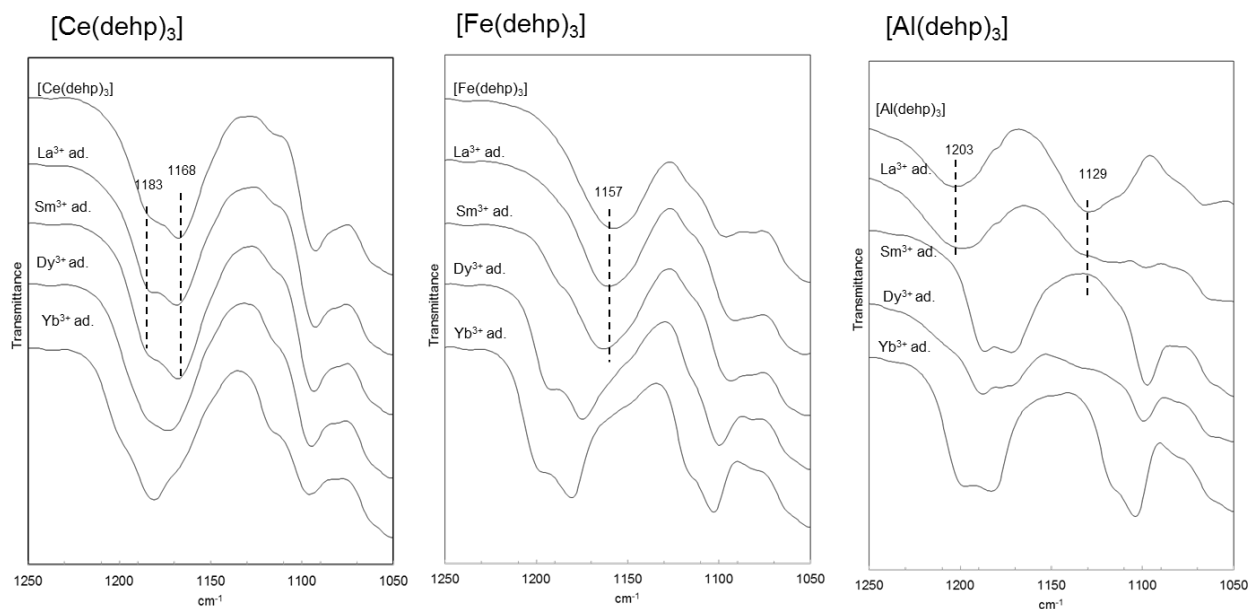

**Figure S3.** FT-IR spectra of  $[M(\text{dehp})_3]$  before and after  $\text{Ln}^{3+}$  adsorption.

[Ce(dehp)<sub>3</sub>]

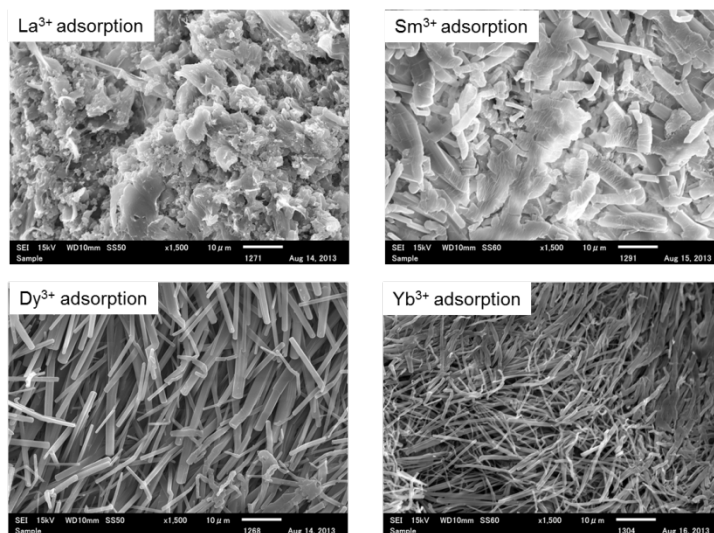

[Fe(dehp)<sub>3</sub>]

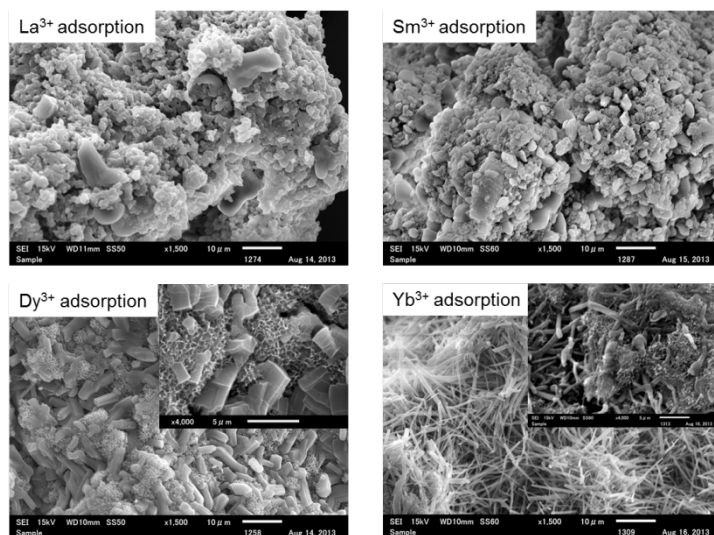

[Al(dehp)<sub>3</sub>]

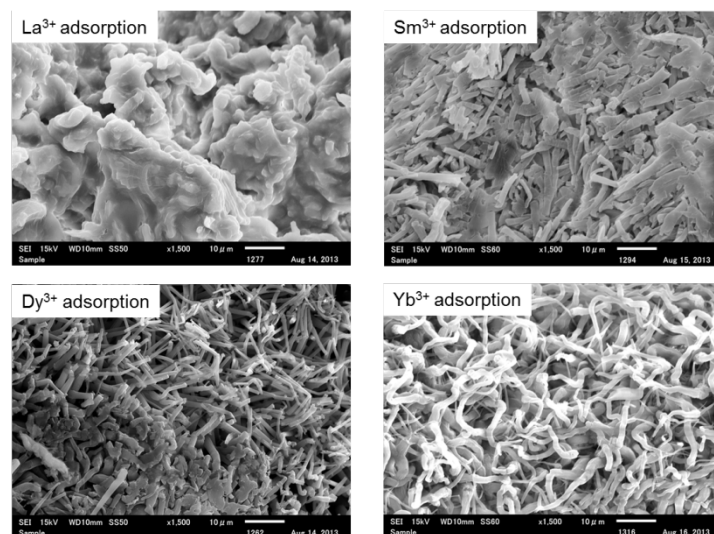

**Figure S4.** SEM images of [M(dehp)<sub>3</sub>] after Ln<sup>3+</sup> adsorption
